# Supplementary material for: Patient Characteristics Associated with Different Types of Prison TB: An Epidemiological Analysis of 921 TB Cases Diagnosed at an Ethiopian Prison
Source: Research Square preprint supplement (doi:10.21203/rs.3.rs-690997/v1), 2021-07-21
Supplement: Supplementary file 1 [file 5c801fbc47a1dcdc880e5f0c.docx]

Supplementary Table: Demographic/clinical characteristics associated with missing HIV test result as determined by multivariable log binomial regression analysis of 871TB cases diagnosed at Kality Federal Prison, Ethiopia during 2009-2017

| Characteristics |  | Missing HIV test result |  |
| --- | --- | --- | --- |
|  | Adj.PR | 95% CI | aP-value |
| Age |  |  |  |
| 18-24 | 0.73 | (0.40, 1.34) | 0.32 |
| 25-44 | 0.91 | (0.51, 1.62) | 0.74 |
| 45-64 | Ref | Ref |  |
| Previous history of TB |  |  |  |
| Yes | 0.43 | (0.21, 0.86) | 0.02 |
| No | Ref | Ref |  |
| TB Diagnosis |  |  |  |
| CD-PTB | 1.22 | (0.77, 1.96) | 0.40 |
| EPTB | 1.94 | (1.26, 2.99) | <0.01 |
| MC-PTB | Ref | Ref |  |

Adj.PR= adjusted prevalence ratio; CI=confidence interval; aP-value from Wald Chi Square test

CD-PTB= clinically diagnosed pulmonary tuberculosis; MC-PTB= microbiologically confirmed PTB
